# Supplementary material for: Telomerase regulation by the long non-coding RNA H19 in human acute promyelocytic leukemia cells
Source: PubMed Central journal article supplement (PMC5923027; doi:10.1186/s12943-018-0835-8), 2018-04-27

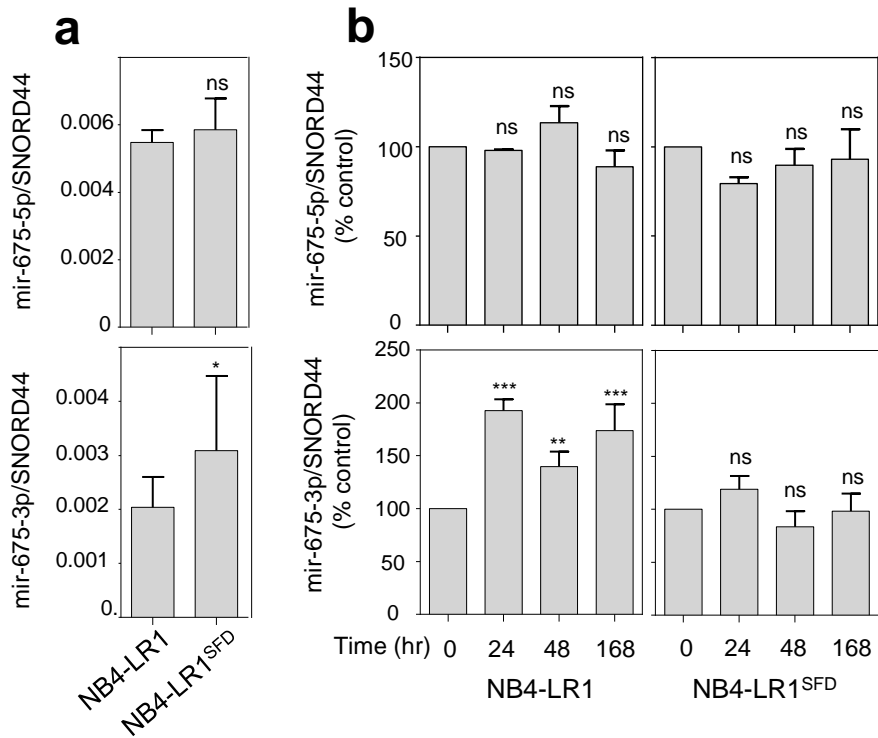

Supplement: 12943_2018_835_MOESM3_ESM.pdf [file 12943_2018_835_MOESM3_ESM.pdf]
